# Supplementary material
Source: Springer Nature journal article supplement (https://www.springermedizin.de/resource/supplementary/12885_2007_754_MOESM4_ESM.pdf/9470236)

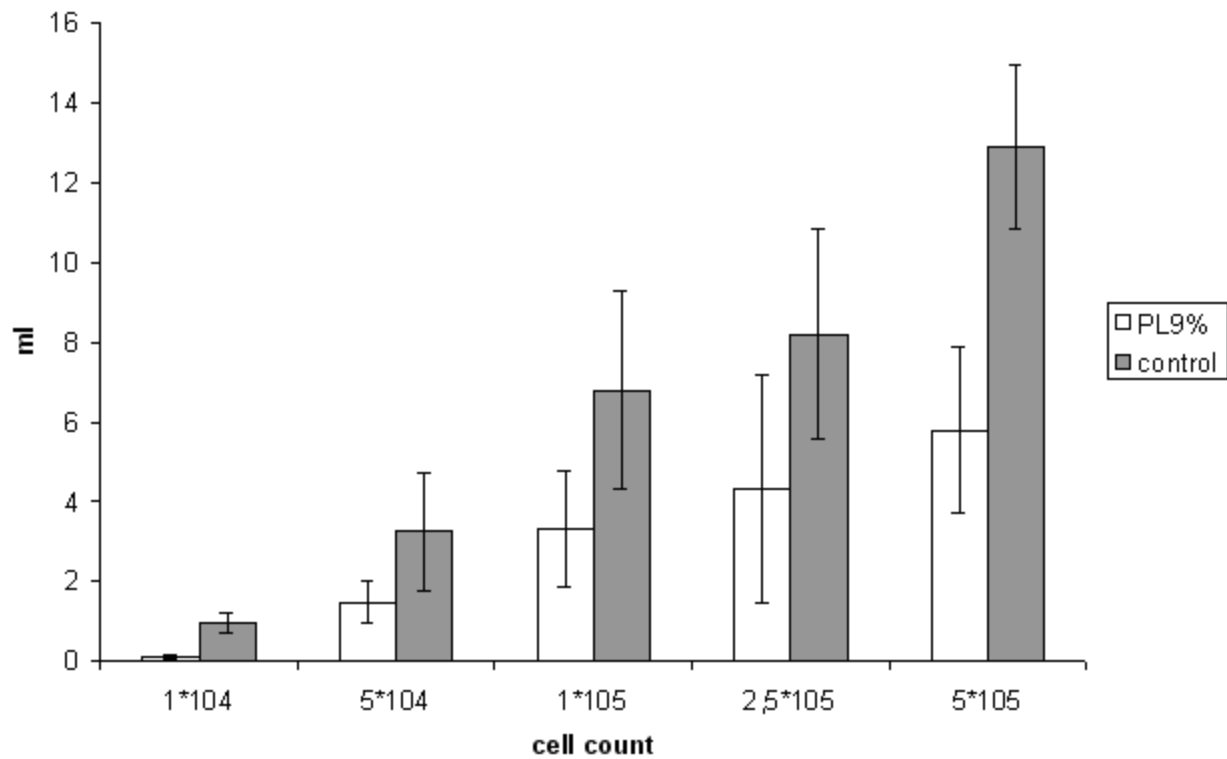

Supplement: MOESM4 [file 9470236]
